# Supplementary material for: Systematic genomic identification of colorectal cancer genes delineating advanced from early clinical stage and metastasis
Source: PubMed Central journal article supplement (PMC3907018; doi:10.1186/1755-8794-6-54), 2013-12-05

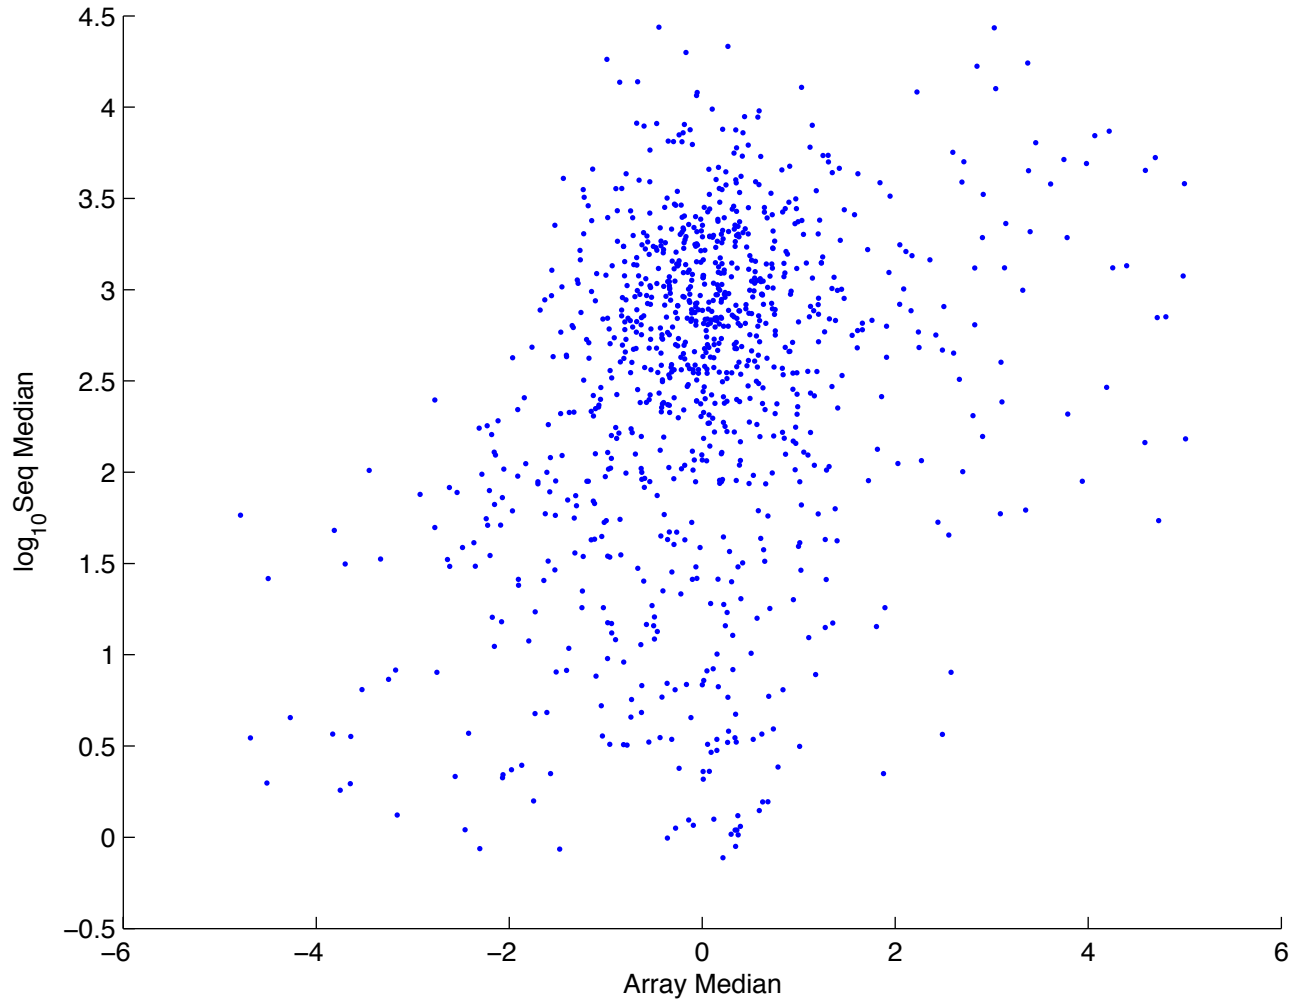

Supplement: 1755-8794-6-54-S4.pdf [file 1755-8794-6-54-S4.pdf]
