# Supplementary material for: Systematic genomic identification of colorectal cancer genes delineating advanced from early clinical stage and metastasis
Source: PubMed Central journal article supplement (PMC3907018; doi:10.1186/1755-8794-6-54), 2013-12-05

|           | <i>Synthetic A</i> | <i>Synthetic B</i> | <i>Synthetic C</i> | <i>Synthetic D</i> | <i>Synthetic E</i> |
|-----------|--------------------|--------------------|--------------------|--------------------|--------------------|
| Stage     | Copy Number        | Copy Number        | Mutation           | mRNA               | Methyl             |
| Stage I   | -2                 | 0                  | 25%                | 0.5                | 0.25               |
| Stage II  | -1                 | 1                  | 50%                | 1                  | 0.5                |
| Stage III | 1                  | 2                  | 75%                | 1.5                | 0.75               |
| Stage IV  | 2                  | 2                  | 100%               | 2                  | 0.95               |

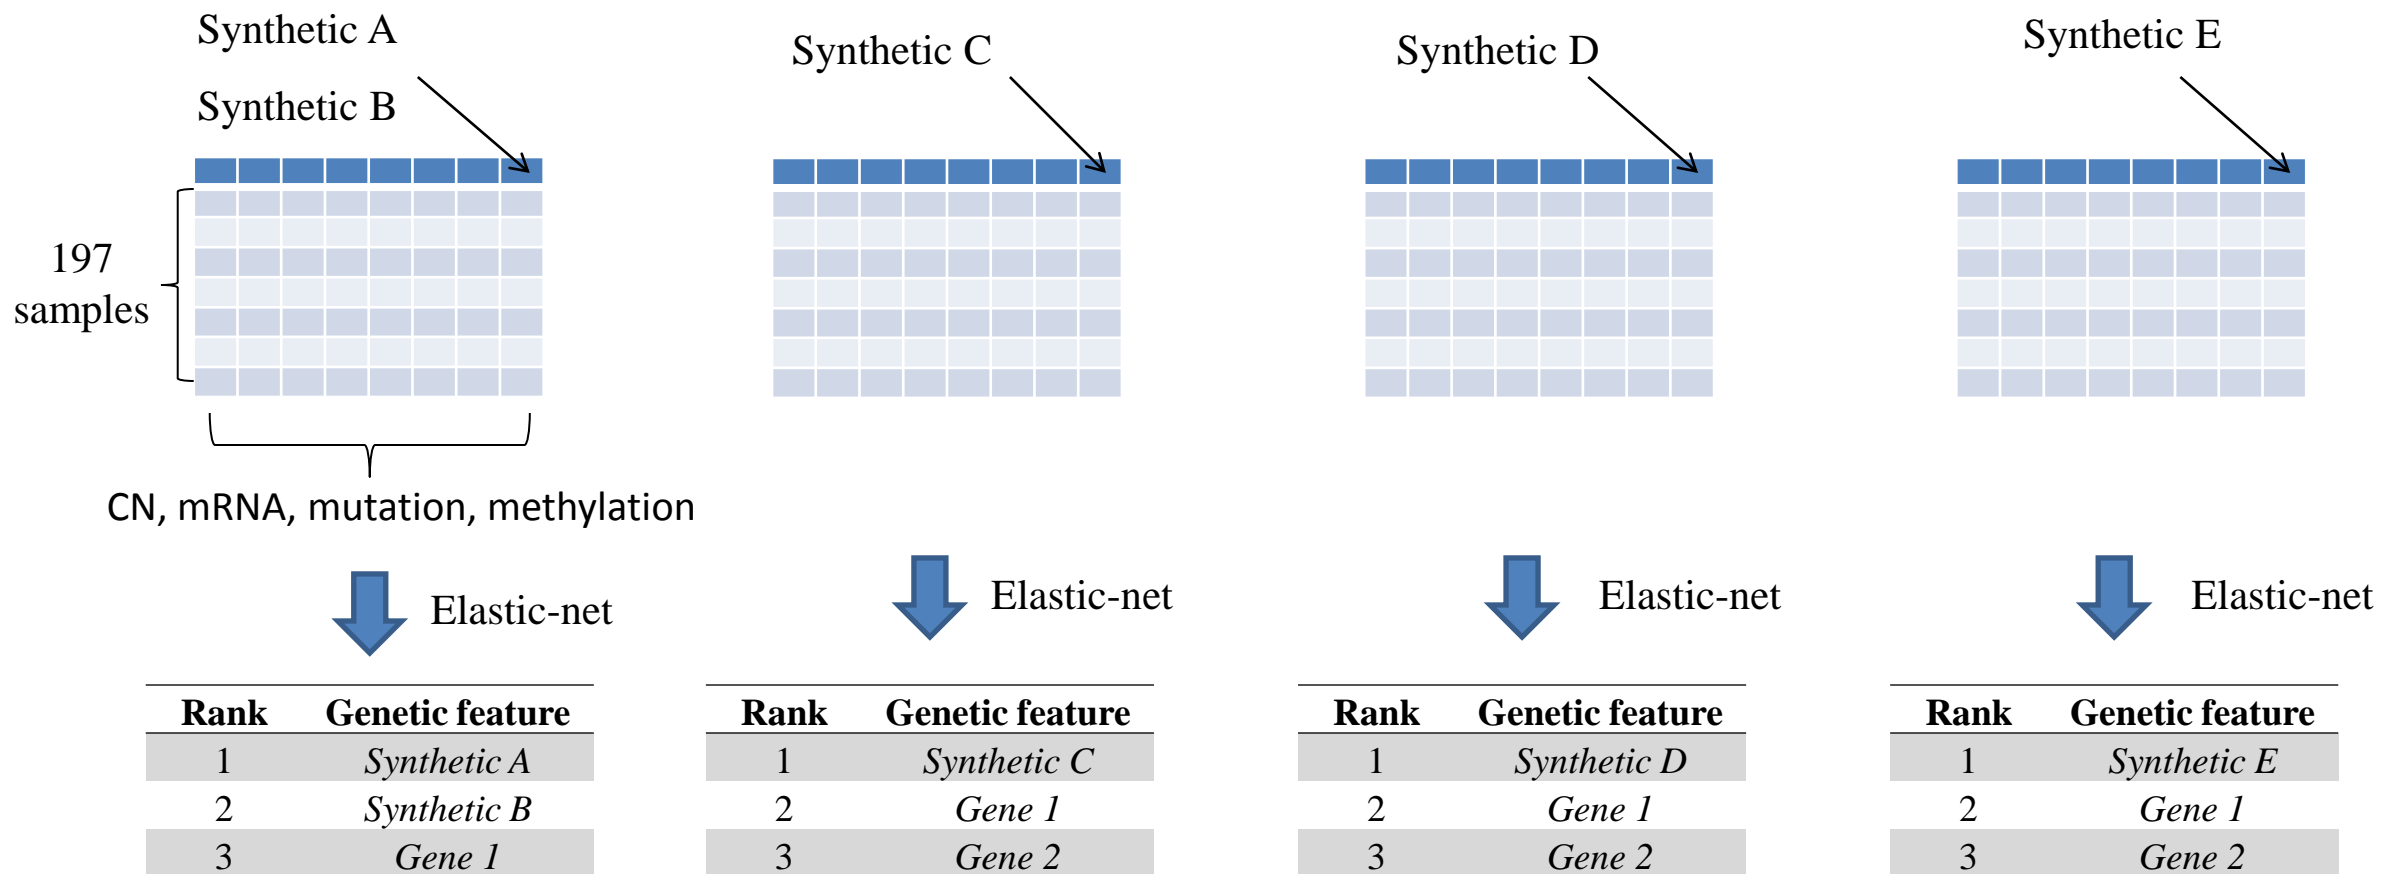

Supplement: 1755-8794-6-54-S7.pdf [file 1755-8794-6-54-S7.pdf]
